# Supplementary material for: A novel colorimetric/fluorescence dual-channel sensor based on NBD for the rapid and highly sensitive detection of cysteine and homocysteine in living cells
Source: Royal Society of Chemistry journal article supplement (doi:10.1039/c5ay02884a), 2016-01-01

## Supporting Information

### **A Novel Colorimetric / Fluorescence Dual-Channel Sensor Based on NBD for Rapid and Highly Sensitive Detection of Cysteine and Homocysteine in Living Cells**

Youming Shen,<sup>ab</sup> Xiangyang Zhang,<sup>\*a</sup> Youyu Zhang,<sup>\*b</sup> Chunxiang Zhang,<sup>a</sup> Junling Jin,<sup>a</sup> Haitao Li,<sup>b</sup> and Shouzhuo Yao<sup>b</sup>

<sup>a</sup> College of Chemistry and Chemical Engineering, Hunan University of Arts and Science, ChangDe, 415000, PR China E-mail: zhangxiangy06@163.com

<sup>b</sup> Key Laboratory of Chemical Biology and Traditional Chinese Medicine Research (Ministry of Education), College of Chemistry and Chemical Engineering, Hunan Normal University, Changsha 410081, PR China E-mail: zhangyy@hunnu.edu.cn

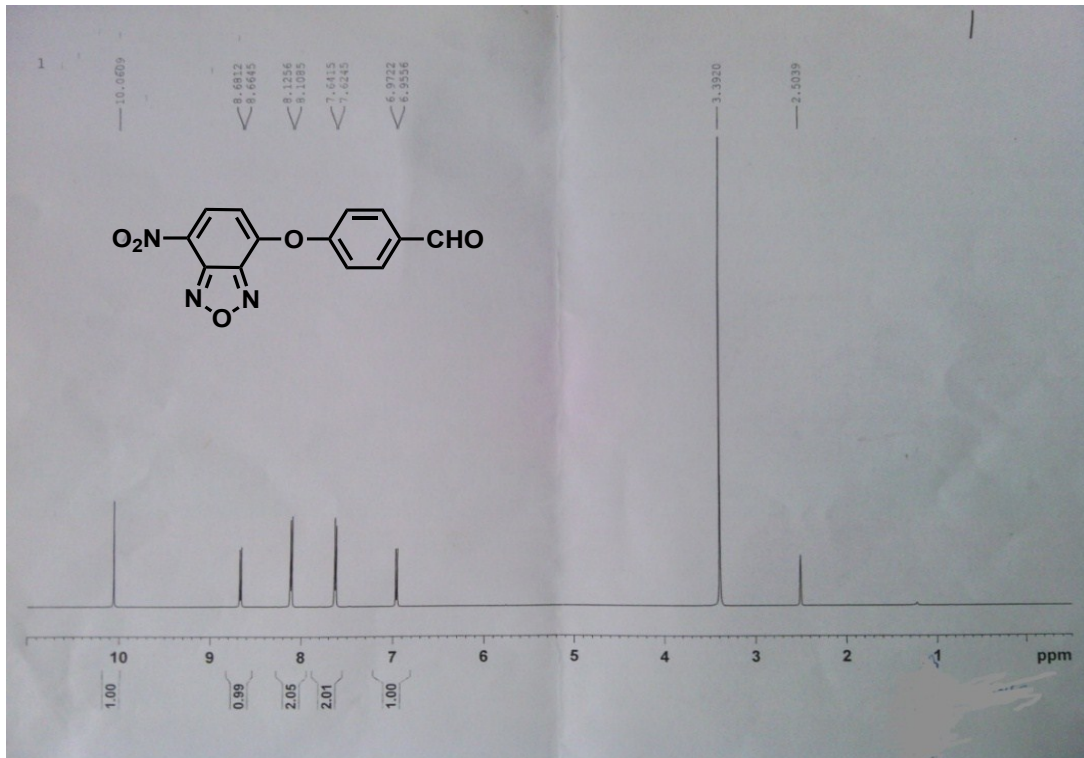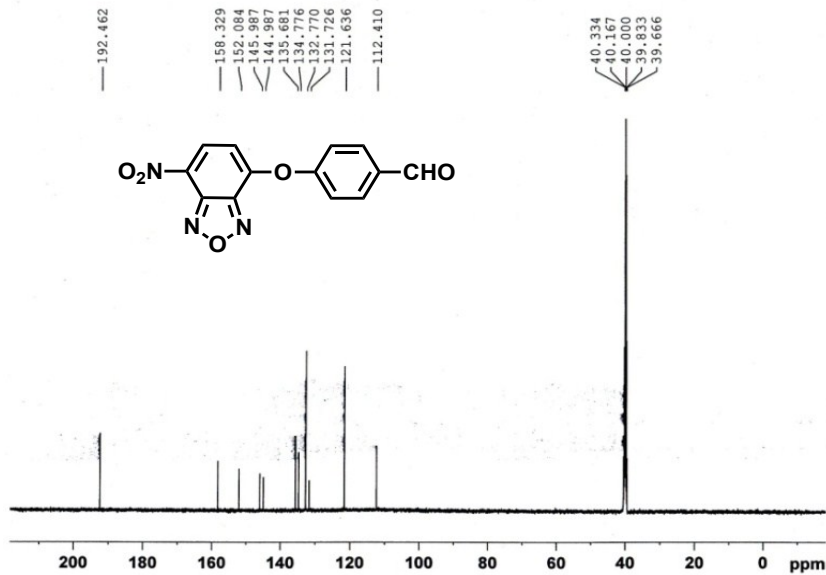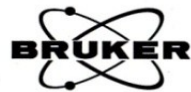

2

```

NAME      shenyuming20131217
EXPNO     3
PROCNO    1
Date_     20131217
Time      18.41
INSTRUM   spect
PROBHD    5 mm TXI 1H/D-
PULPROG   zgpg30
TD         65536
SOLVENT   DMSO
NS         562
DS         4
SWH       29761.904 Hz
FIDRES    0.454131 Hz
AQ         1.1010548 sec
RG         362
DW         16.800 usec
DE         6.50 usec
TE         673.2 K
D1         2.00000000 sec
D11        0.03000000 sec
TD0        1

===== CHANNEL f1 =====
NUC1       13C
P1         11.90 usec
PL1        -3.50 dB
PL1W       223.81184387 W
SFO1       125.7703643 MHz

===== CHANNEL f2 =====
CPDPRG2   waltz16
NUC2       1H
PCPD2     80.00 usec
PL2        4.15 dB
PL12       22.13 dB
PL13       22.13 dB
PL2W       6.03781796 W
PL12W      0.09613468 W
PL13W      0.09613468 W
SFO2       500.1320005 MHz
SI         32768
SF         125.7577806 MHz
WDW        EM
SSB        0
LB         1.00 Hz
GB         0
PC         1.40
  
```

**Analysis Info**

Analysis Name D:\Data\201410\14102901\14102901\_P1-C-8\_01\_2299.d  
Method esi\_pos\_50-1000\_with calibration\_for 1min.m  
Sample Name 14102901  
Comment

Acquisition Date 10/30/2014 3:28:36 PM

Operator BDAL@DE  
Instrument maXis impact

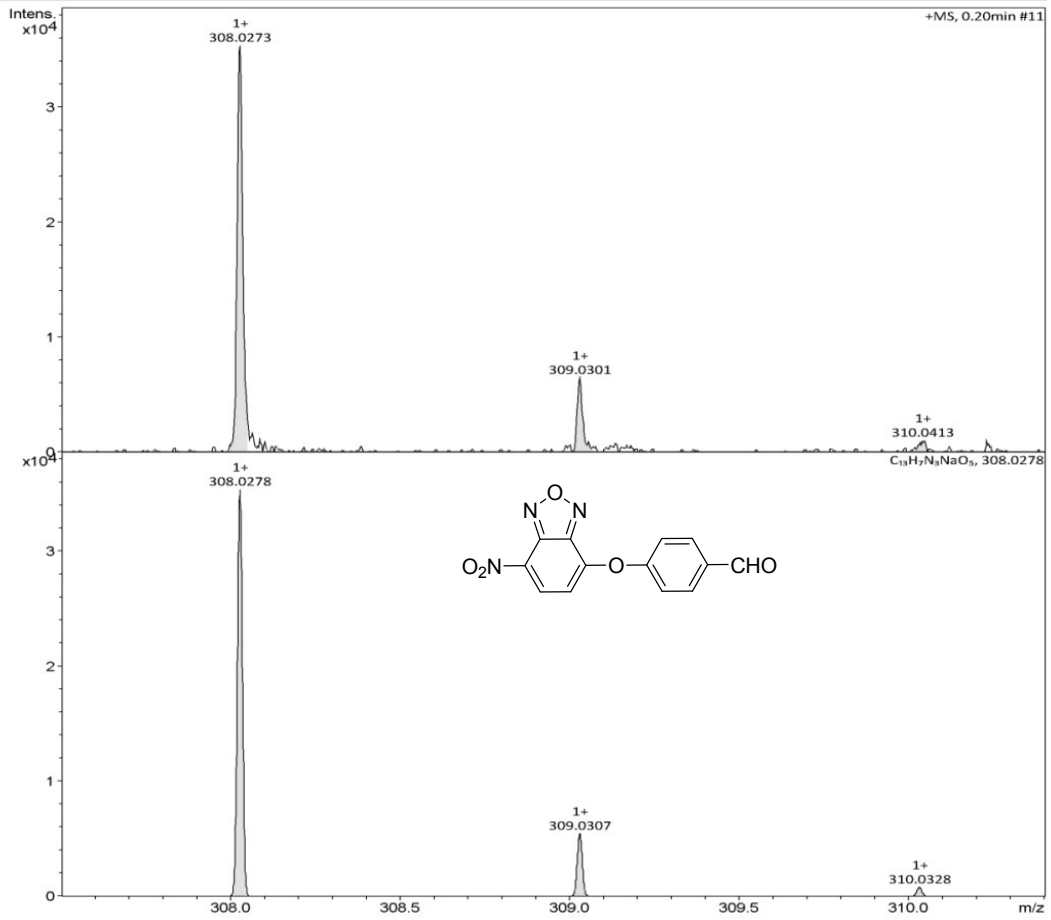

**Analysis Info**

Analysis Name D:\Data\201509\15092402\15092402-1\_P1-E-4\_01\_7785.d  
Method esi\_pos\_50-1000\_with calibration\_for 1min.m  
Sample Name 15092402-1  
Comment

Operator HSJ  
Instrument maXis impact

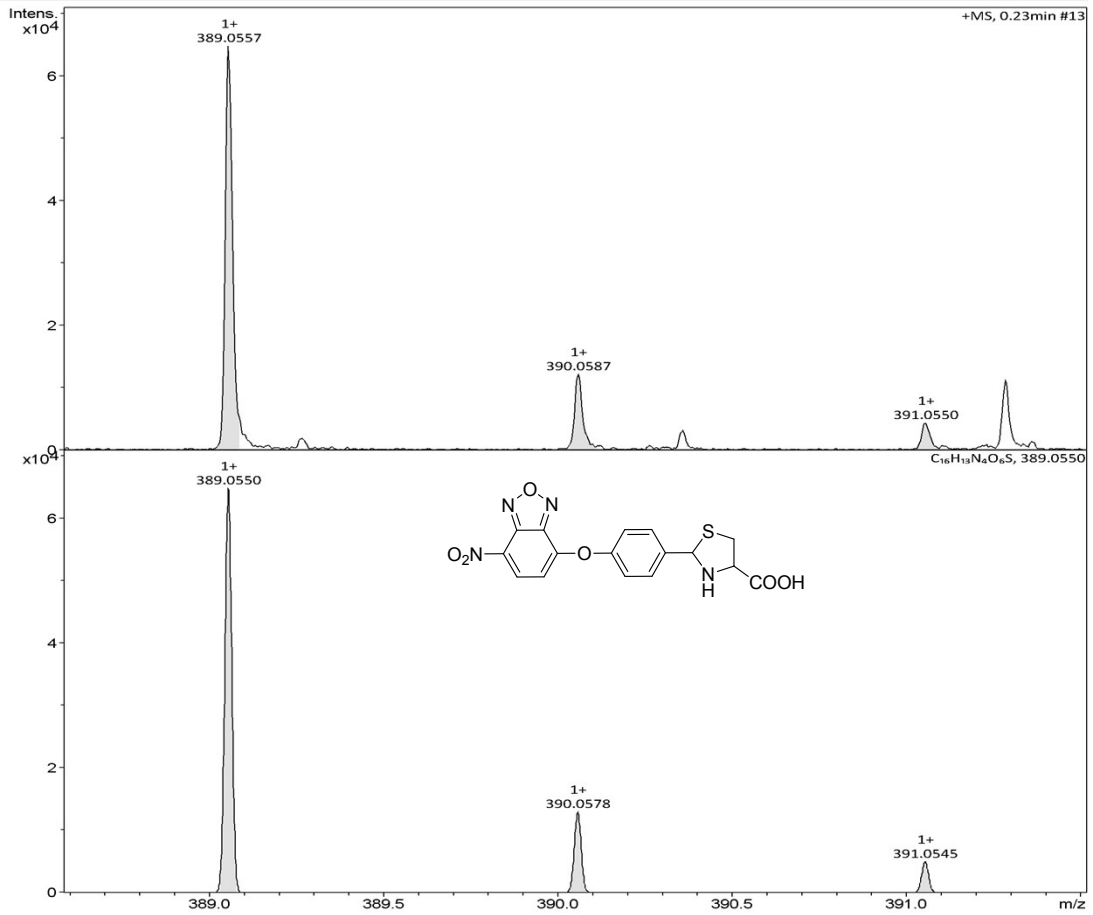

Supplement: c5ay02884a1.pdf [file c5ay02884a1.pdf]
